# Supplementary material for: Indicators to assess physiological heat strain – Part 3: Multi-country field evaluation and consensus recommendations
Source: PubMed Central journal article supplement — Temperature (Austin). 2022 Apr 1;9(3):274–91. doi: 10.1080/23328940.2022.2044739 (PMC9559325; doi:10.1080/23328940.2022.2044739), 2022-04-01
Supplement: KTMP_A_2044739_SM3692.pdf [file KTMP_A_2044739_SM3692.pdf]

# Supplementary Materials for

## Indicators to assess physiological heat strain – Part 3: Multi-country field evaluation and consensus recommendations

Leonidas G. Ioannou<sup>1,2</sup>, Lydia Tsoutsoubi<sup>1</sup>, Konstantinos Mantzios<sup>1</sup>, Maria Vliora<sup>1</sup>, Eleni Nintou<sup>1</sup>, Jacob F. Piil<sup>2</sup>, Sean R. Notley<sup>3</sup>, Petros C. Dinas<sup>1</sup>, George A. Gourzoulidis<sup>4</sup>, George Havenith<sup>5</sup>, Matt Brearley<sup>6,7</sup>, Igor B. Mekjavic<sup>8</sup>, Glen P. Kenny<sup>3,9</sup>, Lars Nybo<sup>2</sup>, Andreas D. Flouris<sup>1,3\*</sup>

<sup>1</sup>FAME Laboratory, Department of Physical Education and Sport Science, University of Thessaly, Trikala, Greece.

<sup>2</sup>Department of Nutrition, Exercise and Sports, August Krogh Building, University of Copenhagen, Denmark.

<sup>3</sup>Human and Environmental Physiology Research Unit, Faculty of Health Sciences, University of Ottawa, Ontario, Canada.

<sup>4</sup>Hellenic Ministry of Labour and Social Affairs, Athens, Greece.

<sup>5</sup>Environmental Ergonomics Research Centre, Loughborough Design School, Loughborough University, Loughborough, United Kingdom.

<sup>6</sup>National Critical Care and Trauma Response Centre, Darwin, NT, Australia

<sup>7</sup>Thermal Hyperformance, Pty Ltd, Takura, QLD, Australia.

<sup>8</sup>Department of Automation, Biocybernetics and Robotics, Jozef Stefan Institute, Slovenia.

<sup>9</sup>Clinical Epidemiology Program, Ottawa Hospital Research Institute, Ottawa, Canada.

\*Correspondence to: [andreasflouris@gmail.com](mailto:andreasflouris@gmail.com)

### **This PDF file includes:**

Figs. S1 to S2

Table S1 to S2

**Figure S1** | Number of articles using or referring to the Wet-Bulb Globe Temperature (WBGT) and the Universal Thermal Climate Index (UTCI) from the year of their development until December 31, 2021.

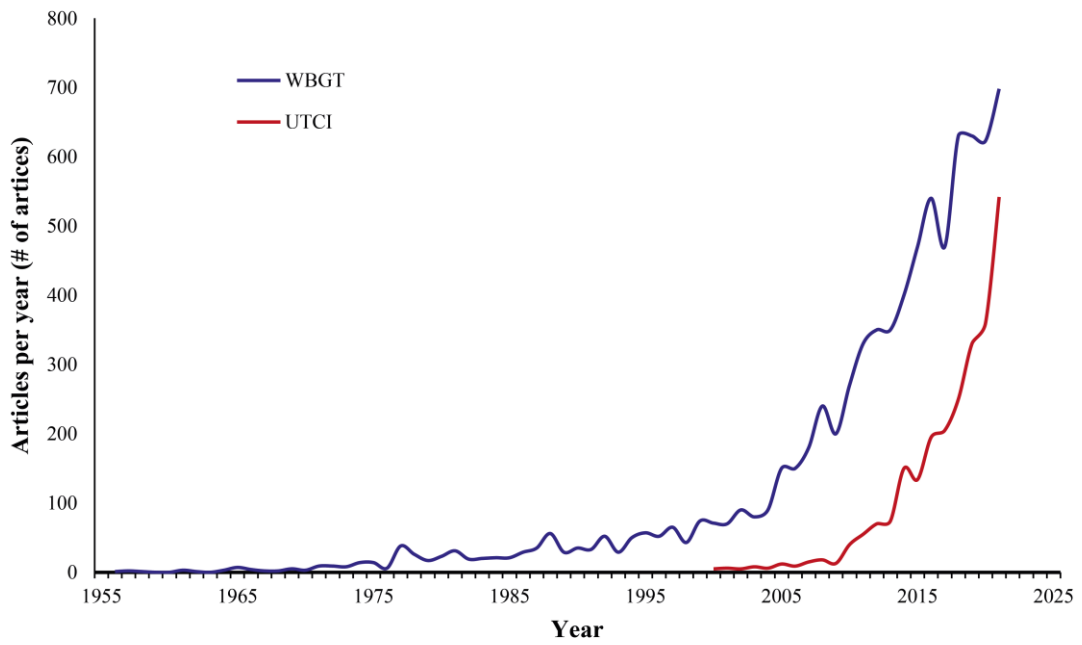

**Figure S2** | Geographical representation and number of articles published using or referring to the Wet-Bulb Globe Temperature (WBGT) and the Universal Thermal Climate Index (UTCI) from the year of their development until December 31, 2021. Left and right maps show the countries that used or referred to the WBGT and UTCI, respectively. Similarly, blue and red bars correspond to the number of articles published by different countries using or referring to the WBGT or UTCI, respectively.

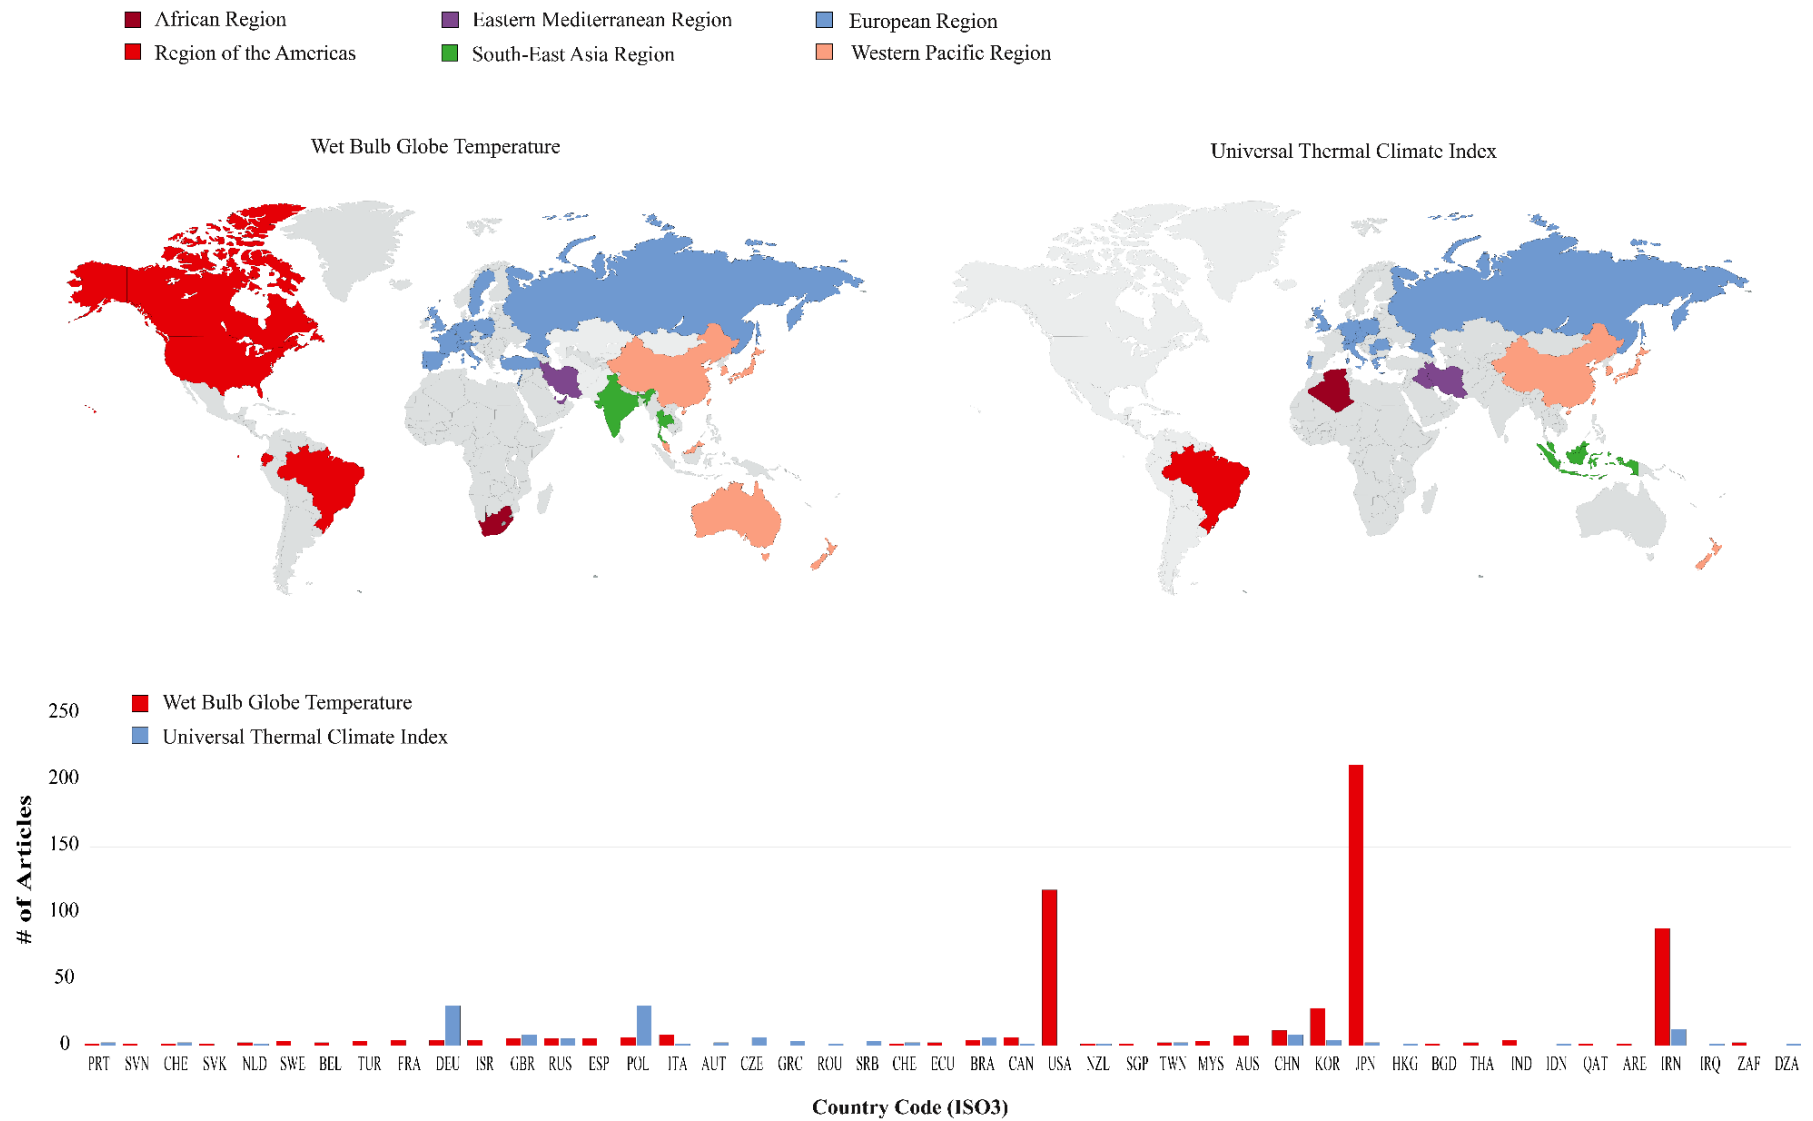

**Table S1** | Distribution of work hours assessed across different air temperatures.

| Temperature range (°C) | Percent of work hours assessed |
|------------------------|--------------------------------|
| < 0                    | 1.1                            |
| 0 through 5            | 0.7                            |
| 5 through 10           | 0.5                            |
| 10 through 15          | 0.0                            |
| 15 through 20          | 1.1                            |
| 20 through 25          | 7.9                            |
| 25 through 30          | 24.4                           |
| 30 through 35          | 32.3                           |
| 35 through 40          | 22.4                           |
| 40 through 45          | 9.6                            |
| > 45                   | 1.1                            |

**Table S2** | Quantitative evaluation of the 61 occupational meteo-based thermal stress indicators. Note: <sup>[cit:]</sup> indicates that we could not locate the full text of the original article, thus the equation used was found in the cited publication; <sup>[appr:]</sup> indicates indicators requiring specialized equipment, thus an equation found in the cited publication was used for their approximation.

| ID                   | Thermal Index                                                                                                  | Correlation coefficient (r) |                 |                   |            |            | ROC               | Sensitivity       | Specificity       | RR                | Categories  | Guidance    | Cost-effectiveness |            | SCORE |
|----------------------|----------------------------------------------------------------------------------------------------------------|-----------------------------|-----------------|-------------------|------------|------------|-------------------|-------------------|-------------------|-------------------|-------------|-------------|--------------------|------------|-------|
| #                    |                                                                                                                | T <sub>core</sub>           | T <sub>sk</sub> | T <sub>body</sub> | HR         | HYD        | T <sub>body</sub> | T <sub>body</sub> | T <sub>body</sub> | T <sub>body</sub> |             | 1 year      | 10 years           | %          |       |
| <b>Delphi item:</b>  |                                                                                                                | <b>1</b>                    | <b>2</b>        | <b>3</b>          | <b>4</b>   | <b>13</b>  | <b>5</b>          | <b>6</b>          | <b>7</b>          | <b>8</b>          | <b>9</b>    | <b>10</b>   | <b>11</b>          | <b>12</b>  |       |
| <b>Delphi score:</b> |                                                                                                                | <b>13.3</b>                 | <b>7.1</b>      | <b>6.9</b>        | <b>6.4</b> | <b>6.8</b> | <b>4.7</b>        | <b>8.1</b>        | <b>2.5</b>        | <b>4.7</b>        | <b>12.7</b> | <b>16.3</b> | <b>4.7</b>         | <b>6.0</b> |       |
| 168                  | Wet Bulb Globe Temperature (indoor) (Yaglou; 1956) <sup>1</sup>                                                | 0.114                       | 0.489           | 0.487             | 0.079      | -          | 0.722             | 0.393             | 0.859             | 1.000             | ✓           | ✓           | 0.888              | 0.896      | 55.4  |
| 169                  | Wet Bulb Globe Temperature (outdoor) (Yaglou; 1956) <sup>1</sup>                                               | 0.126                       | 0.472           | 0.441             | 0.153      | -          | 0.701             | 0.510             | 0.811             | 1.000             | ✓           | ✓           | 0.633              | 0.681      | 55.1  |
| 165                  | Universal Thermal Climate Index (Jendritzky; 2012) <sup>2</sup>                                                | 0.045                       | 0.468           | 0.387             | 0.133      | -          | 0.678             | 0.631             | 0.336             | 0.730             | ✓           | ✓           | 0.594              | 0.639      | 51.7  |
| 146                  | Temperature Humidity Index (Nieuwolt; 1977) <sup>[cit:3]</sup>                                                 | -                           | 0.565           | 0.517             | 0.154      | 0.132      | 0.710             | 0.901             | 0.280             | 1.000             | ✓           |             | 1.000              | 1.000      | 42.0  |
| 145                  | Temperature Humidity Index (Kyle; 1994) <sup>[cit:4]</sup>                                                     | 0.216                       | 0.304           | 0.362             | 0.351      | 0.047      | 0.738             | 0.855             | 0.183             | 0.686             | ✓           |             | 0.965              | 0.965      | 41.0  |
| 121                  | Relative Strain Index (Kyle; 1992) <sup>[cit:5]</sup>                                                          | 0.077                       | 0.564           | 0.557             | 0.044      | 0.054      | 0.735             | 0.747             | 0.495             | 0.791             | ✓           |             | 0.960              | 0.960      | 40.8  |
| 85                   | Humidex (Masterson; 1979) <sup>[cit:6]</sup>                                                                   | 0.112                       | 0.461           | 0.461             | 0.090      | -          | 0.722             | 0.850             | 0.429             | 0.805             | ✓           |             | 0.952              | 0.952      | 40.7  |
| 122                  | Relative Strain Index (Lee; 1966) <sup>7</sup>                                                                 | 0.085                       | 0.534           | 0.528             | -          | 0.052      | 0.731             | 0.606             | 0.765             | 1.000             | ✓           |             | 0.958              | 0.958      | 40.7  |
| 117                  | Radiative Effective Temperature (Blazejczyk; 2004) <sup>8</sup>                                                | 0.061                       | 0.602           | 0.534             | 0.106      | -          | 0.714             | 0.918             | 0.244             | 1.000             | ✓           |             | 0.463              | 0.499      | 40.3  |
| 21                   | Biologically Active Temperature (Tsitsenko; 1971) <sup>[cit:9]</sup>                                           | -                           | 0.504           | 0.491             | 0.123      | 0.135      | 0.718             | 0.995             | 0.155             | 1.000             | ✓           |             | 0.656              | 0.661      | 40.0  |
| 9                    | Apparent Temperature (Kalkstein; 1986) <sup>10</sup>                                                           | -                           | 0.573           | 0.542             | 0.122      | 0.114      | 0.746             | 0.752             | 0.264             | 0.814             | ✓           |             | 0.946              | 0.946      | 39.8  |
| 75                   | Fighter Index of Thermal Stress (Direct Sunlight) (Stribley; 1978) <sup>11</sup>                               | 0.105                       | 0.459           | 0.455             | 0.089      | 0.000      | 0.721             | 0.816             | 0.547             | 1.000             | ✓           |             | 0.450              | 0.484      | 39.2  |
| 13                   | Apparent Temperature (shade) (Steadman; 1984) <sup>12</sup>                                                    | -                           | 0.552           | 0.529             | 0.129      | 0.058      | 0.726             | 0.785             | 0.375             | 0.909             | ✓           |             | 0.631              | 0.636      | 39.0  |
| 144                  | Temperature Humidity Index (Romanian National Institute of Meteorology and Hydrology; 2000) <sup>[cit:4]</sup> | 0.181                       | 0.098           | -                 | 0.388      | 0.047      | 0.552             | 0.998             | 0.382             | 1.000             | ✓           |             | 0.915              | 0.915      | 38.9  |
| 80                   | Heat Index (Blazejczyk; 2012) <sup>6</sup>                                                                     | 0.135                       | 0.508           | 0.501             | 0.085      | 0.050      | 0.733             | 0.579             | 0.345             | 0.667             | ✓           |             | 0.905              | 0.905      | 38.4  |
| 65                   | Equatorial Comfort Index (Webb; 1960) <sup>[cit:13]</sup>                                                      | 0.114                       | 0.449           | 0.441             | 0.073      | 0.000      | 0.704             | 0.530             | 0.638             | 0.837             | ✓           |             | 0.892              | 0.892      | 38.2  |
| 132                  | Simplified Wet Bulb Globe Temperature (Gagge; 1976) <sup>[cit:14]</sup>                                        | 0.104                       | 0.536           | 0.517             | 0.063      | 0.050      | 0.740             | 0.666             | 0.034             | 0.667             | ✓           |             | 0.898              | 0.898      | 38.1  |
| 10                   | Apparent Temperature (Smoyer-Tomic; 2001) <sup>15</sup>                                                        | 0.039                       | 0.578           | 0.555             | 0.089      | 0.047      | 0.742             | 0.583             | 0.341             | 0.667             | ✓           |             | 0.896              | 0.896      | 38.1  |

**Table S2** | Quantitative evaluation of the 61 occupational meteo-based thermal stress indicators. Note: <sup>[cit:]</sup> indicates that we could not locate the full text of the original article, thus the equation used was found in the cited publication; <sup>[appr:]</sup> indicates indicators requiring specialized equipment, thus an equation found in the cited publication was used for their approximation.

| ID                   | Thermal Index                                                                                         | Correlation coefficient (r) |                 |                   |            |            | ROC               | Sensitivity       | Specificity       | RR                | Categories  | Guidance    | Cost-effectiveness |            | SCORE |
|----------------------|-------------------------------------------------------------------------------------------------------|-----------------------------|-----------------|-------------------|------------|------------|-------------------|-------------------|-------------------|-------------------|-------------|-------------|--------------------|------------|-------|
| #                    |                                                                                                       | T <sub>core</sub>           | T <sub>sk</sub> | T <sub>body</sub> | HR         | HYD        | T <sub>body</sub> | T <sub>body</sub> | T <sub>body</sub> | T <sub>body</sub> |             | 1 year      | 10 years           | %          |       |
| <b>Delphi item:</b>  |                                                                                                       | <b>1</b>                    | <b>2</b>        | <b>3</b>          | <b>4</b>   | <b>13</b>  | <b>5</b>          | <b>6</b>          | <b>7</b>          | <b>8</b>          | <b>9</b>    | <b>10</b>   | <b>11</b>          | <b>12</b>  |       |
| <b>Delphi score:</b> |                                                                                                       | <b>13.3</b>                 | <b>7.1</b>      | <b>6.9</b>        | <b>6.4</b> | <b>6.8</b> | <b>4.7</b>        | <b>8.1</b>        | <b>2.5</b>        | <b>4.7</b>        | <b>12.7</b> | <b>16.3</b> | <b>4.7</b>         | <b>6.0</b> |       |
| 11                   | Apparent Temperature (indoor) (Steadman; 1994) <sup>16</sup>                                          | 0.032                       | 0.568           | 0.547             | 0.097      | 0.047      | 0.742             | 0.553             | 0.373             | 0.667             | ✓           |             | 0.888              | 0.888      | 37.7  |
| 166                  | Wet Bulb Globe Temperature (eq. 1) (Ono; 2014) <sup>17</sup>                                          | 0.090                       | 0.528           | 0.492             | 0.086      | -          | 0.725             | 0.472             | 0.843             | 1.000             | ✓           |             | 0.432              | 0.465      | 37.6  |
| 57                   | Discomfort Index (Weather Services of South Africa; 2018) <sup>18</sup>                               | -                           | 0.563           | 0.535             | 0.122      | 0.049      | 0.742             | 0.582             | 0.317             | 0.667             | ✓           |             | 0.880              | 0.880      | 37.4  |
| 76                   | Fighter Index of Thermal Stress (Moderate Overcast) (Stribley; 1978) <sup>11</sup>                    | 0.105                       | 0.460           | 0.456             | 0.089      | -          | 0.721             | 0.533             | 0.753             | 1.000             | ✓           |             | 0.429              | 0.461      | 37.3  |
| 167                  | Wet Bulb Globe Temperature (eq. 2) (Ono; 2014) <sup>17</sup>                                          | 0.077                       | 0.533           | 0.496             | 0.065      | -          | 0.723             | 0.455             | 0.846             | 1.000             | ✓           |             | 0.427              | 0.460      | 37.2  |
| 12                   | Apparent Temperature (indoor) (Steadman; 1984) <sup>12</sup>                                          | -                           | 0.584           | 0.551             | 0.116      | 0.120      | 0.744             | 0.448             | 0.413             | 0.667             | ✓           |             | 0.877              | 0.877      | 36.8  |
| 52                   | Discomfort Index (Giles; 1990) <sup>19</sup>                                                          | -                           | 0.552           | 0.527             | 0.118      | 0.047      | 0.740             | 0.457             | 0.439             | 0.656             | ✓           |             | 0.856              | 0.856      | 36.3  |
| 14                   | Apparent Temperature (shade) (Steadman; 1994) <sup>16</sup>                                           | -                           | 0.537           | 0.524             | 0.114      | 0.050      | 0.720             | 0.555             | 0.322             | 0.667             | ✓           |             | 0.571              | 0.576      | 35.3  |
| 104                  | Normal Equivalent Effective Temperature (Boksha; 1980) <sup>[cit:9]</sup>                             | -                           | 0.504           | 0.491             | 0.123      | 0.135      | 0.718             | 0.605             | 0.155             | 0.486             | ✓           |             | 0.559              | 0.564      | 34.0  |
| 130                  | Simplified Universal Thermal Climate Index (Blazejczyk; 2011) <sup>20</sup>                           | 0.054                       | 0.440           | 0.348             | 0.070      | -          | 0.654             | 0.520             | 0.243             | 0.934             | ✓           |             | 0.384              | 0.413      | 33.4  |
| 15                   | Apparent Temperature (sun) (Steadman; 1984) <sup>12</sup>                                             | 0.036                       | 0.563           | 0.506             | 0.032      | -          | 0.717             | 0.391             | 0.343             | 0.570             | ✓           |             | 0.375              | 0.403      | 32.6  |
| 124                  | Robaa's Index (Robaa; 2003) <sup>[cit:21]</sup>                                                       | -                           | 0.548           | 0.514             | 0.157      | 0.143      | 0.719             | 0.453             | 0.173             | 0.463             | ✓           |             | 0.385              | 0.414      | 32.6  |
| 16                   | Apparent Temperature (sun) (Steadman; 1994) <sup>16</sup>                                             | 0.041                       | 0.552           | 0.506             | 0.034      | -          | 0.713             | 0.451             | 0.177             | 0.500             | ✓           |             | 0.371              | 0.400      | 32.3  |
| 17                   | Approximated Subjective Temperature (Auliciems; 2007) <sup>22</sup>                                   | -                           | 0.490           | 0.412             | -          | -          | 0.679             | 0.486             | 0.306             | 0.667             | ✓           |             | 0.364              | 0.392      | 31.7  |
| 141                  | Swedish Wet Bulb Globe Temperature (Eriksson; 1974) <sup>[cit:23]</sup>                               | 0.116                       | 0.428           | 0.392             | 0.145      | -          | 0.686             | 0.491             | 0.115             | 0.302             | ✓           |             | 0.361              | 0.389      | 31.4  |
| 69                   | Equivalent Temperature (Brundl; 1984) <sup>24</sup>                                                   | 0.078                       | 0.167           | 0.248             | 0.049      | 0.077      | 0.568             | 0.342             | 0.807             | 0.656             | ✓           |             | 0.734              | 0.734      | 30.9  |
| 131                  | Simplified Wet Bulb Globe Temperature (American College of Sports Medicine; 1984) <sup>[cit:14]</sup> | 0.120                       | 0.482           | 0.488             | 0.094      | -          | 0.718             | -                 | -                 | -                 | ✓           |             | 0.656              | 0.656      | 28.1  |
| 173                  | Wet Cooling Power (Landsberg; 1972) <sup>13</sup>                                                     | 0.065                       | -               | -                 | -          | 0.102      | 0.501             | -                 | -                 | -                 | ✓           |             | 0.201              | 0.217      | 16.9  |

**Table S2** | Quantitative evaluation of the 61 occupational meteo-based thermal stress indicators. Note: <sup>[cit:]</sup> indicates that we could not locate the full text of the original article, thus the equation used was found in the cited publication; <sup>[appr:]</sup> indicates indicators requiring specialized equipment, thus an equation found in the cited publication was used for their approximation.

| ID            | Thermal Index                                                                           | Correlation coefficient (r) |                 |                   |       |       | ROC               | Sensitivity       | Specificity       | RR                | Categories | Guidance | Cost-effectiveness |          | SCORE |
|---------------|-----------------------------------------------------------------------------------------|-----------------------------|-----------------|-------------------|-------|-------|-------------------|-------------------|-------------------|-------------------|------------|----------|--------------------|----------|-------|
| #             |                                                                                         | T <sub>core</sub>           | T <sub>sk</sub> | T <sub>body</sub> | HR    | HYD   | T <sub>body</sub> | T <sub>body</sub> | T <sub>body</sub> | T <sub>body</sub> |            |          | 1 year             | 10 years | %     |
| Delphi item:  |                                                                                         | 1                           | 2               | 3                 | 4     | 13    | 5                 | 6                 | 7                 | 8                 | 9          | 10       | 11                 | 12       |       |
| Delphi score: |                                                                                         | 13.3                        | 7.1             | 6.9               | 6.4   | 6.8   | 4.7               | 8.1               | 2.5               | 4.7               | 12.7       | 16.3     | 4.7                | 6.0      |       |
| 79            | Heart Rate Safe limit (LaFleur; 1971)                                                   | -                           | 0.570           | 0.548             | 0.098 | 0.048 | 0.742             | -                 | -                 | -                 |            |          | 0.320              | 0.320    | 13.4  |
| 78            | Heart Rate (Moderate Intensity) (Fuller; 1966) <sup>25</sup>                            | -                           | 0.569           | 0.548             | 0.098 | 0.048 | 0.742             | -                 | -                 | -                 |            |          | 0.320              | 0.320    | 13.4  |
| 64            | Environmental Stress Index (Moran; 2001) <sup>26</sup>                                  | 0.094                       | 0.523           | 0.497             | 0.071 | -     | 0.721             | -                 | -                 | -                 |            |          | 0.194              | 0.212    | 13.1  |
| 127           | Simple Index (Moran; 2001) <sup>26</sup>                                                | 0.077                       | 0.533           | 0.489             | 0.069 | -     | 0.726             | -                 | -                 | -                 |            |          | 0.191              | 0.209    | 12.9  |
| 133           | Skin Temperature (Blazejczyk; 2005) <sup>27</sup>                                       | -                           | 0.582           | 0.517             | 0.107 | 0.147 | 0.723             | -                 | -                 | -                 |            |          | 0.154              | 0.166    | 12.5  |
| 66            | Equivalent Effective Temperature (Aizenshtat; 1974) <sup>[cit:28]</sup>                 | -                           | 0.529           | 0.508             | 0.123 | 0.063 | 0.722             | -                 | -                 | -                 |            |          | 0.205              | 0.207    | 12.4  |
| 25            | Cooling Power (Becker; 1972) <sup>[cit:29]</sup>                                        | -                           | 0.501           | 0.466             | 0.108 | 0.189 | 0.712             | -                 | -                 | -                 |            |          | 0.297              | 0.315    | 12.2  |
| 67            | Equivalent Effective Temperature (Aizenshtat; 1982) <sup>[cit:30]</sup>                 | -                           | 0.504           | 0.491             | 0.123 | 0.135 | 0.718             | -                 | -                 | -                 |            |          | 0.208              | 0.210    | 12.1  |
| 128           | Simplified Radiation Equivalent Effective Temperature (Boksha; 1980) <sup>[cit:9]</sup> | -                           | 0.504           | 0.491             | 0.123 | 0.135 | 0.718             | -                 | -                 | -                 |            |          | 0.208              | 0.210    | 12.1  |
| 176           | Wet Kata Cooling Power (Chamber of Mines of South Africa; 1972) <sup>31</sup>           | -                           | 0.542           | 0.500             | 0.112 | 0.044 | 0.726             | -                 | -                 | -                 |            |          | 0.142              | 0.152    | 12.0  |
| 100           | Modified Environmental Stress Index (Moran; 2003) <sup>32</sup>                         | -                           | 0.546           | 0.513             | 0.031 | -     | 0.722             | -                 | -                 | -                 |            |          | 0.174              | 0.191    | 11.8  |
| 116           | Psychrometric Wet Bulb Temperature (McPherson; 2008) <sup>[cit:14]</sup>                | 0.035                       | 0.451           | 0.468             | 0.072 | -     | 0.674             | -                 | -                 | -                 |            |          | 0.182              | 0.183    | 11.3  |
| 150           | Temperature Resultante Miniere (Vogt; 1978) <sup>[cit:33]</sup>                         | 0.037                       | 0.454           | 0.455             | 0.098 | 0.051 | 0.672             | -                 | -                 | -                 |            |          | 0.133              | 0.143    | 11.2  |
| 174           | Wet Globe Temperature (Botsball) (Botsford; 1971) <sup>[appr:34]</sup>                  | 0.102                       | 0.360           | 0.313             | 0.154 | -     | 0.654             | -                 | -                 | -                 |            |          | 0.123              | 0.132    | 10.7  |
| 134           | Skin Wettedness (Blazejczyk; 2005) <sup>27</sup>                                        | 0.037                       | 0.446           | 0.373             | 0.058 | 0.158 | 0.712             | -                 | -                 | -                 |            |          | 0.133              | 0.143    | 10.5  |
| 59            | Dry Kata Cooling (Maloney; 2011) <sup>35</sup>                                          | -                           | 0.394           | 0.362             | 0.075 | 0.189 | 0.686             | -                 | -                 | -                 |            |          | 0.253              | 0.268    | 10.2  |
| 95            | Mean Radiant Temperature (Ramsey; 2001) <sup>36</sup>                                   | -                           | 0.382           | 0.305             | 0.080 | -     | 0.658             | -                 | -                 | -                 |            |          | 0.102              | 0.110    | 8.9   |
| 149           | Temperature of the exhaled air (McPherson; 1993) <sup>31</sup>                          | 0.086                       | 0.215           | 0.288             | 0.047 | 0.078 | 0.584             | -                 | -                 | -                 |            |          | 0.215              | 0.215    | 8.7   |
| 102           | Net Radiation (Cena; 1984) <sup>37</sup>                                                | -                           | 0.347           | 0.268             | 0.098 | -     | 0.652             | -                 | -                 | -                 |            |          | 0.097              | 0.104    | 8.4   |

**Table S2** | Quantitative evaluation of the 61 occupational meteo-based thermal stress indicators. Note: <sup>[cit:]</sup> indicates that we could not locate the full text of the original article, thus the equation used was found in the cited publication; <sup>[appr:]</sup> indicates indicators requiring specialized equipment, thus an equation found in the cited publication was used for their approximation.

| ID                                                                                                                                                                                                                                                                                                                                                                                                                                                                                                                                                                                                                                                                                                                                                                                                                                                                                                                                                                                                                                                                                                                                                                                                                                                                                                                                                                                                                                                                                                                                                                                                                                                                                                                                                                                                                                                                                                                                                                                                                                                                                                                                                                                                                                                                                                                                                                                                                                               | Thermal Index                                                                                       | Correlation coefficient (r) |                 |                   |            |            | ROC               | Sensitivity       | Specificity       | RR                | Categories  | Guidance    | Cost-effectiveness |            | SCORE |       |        |        |        |        |        |        |        |        |         |
|--------------------------------------------------------------------------------------------------------------------------------------------------------------------------------------------------------------------------------------------------------------------------------------------------------------------------------------------------------------------------------------------------------------------------------------------------------------------------------------------------------------------------------------------------------------------------------------------------------------------------------------------------------------------------------------------------------------------------------------------------------------------------------------------------------------------------------------------------------------------------------------------------------------------------------------------------------------------------------------------------------------------------------------------------------------------------------------------------------------------------------------------------------------------------------------------------------------------------------------------------------------------------------------------------------------------------------------------------------------------------------------------------------------------------------------------------------------------------------------------------------------------------------------------------------------------------------------------------------------------------------------------------------------------------------------------------------------------------------------------------------------------------------------------------------------------------------------------------------------------------------------------------------------------------------------------------------------------------------------------------------------------------------------------------------------------------------------------------------------------------------------------------------------------------------------------------------------------------------------------------------------------------------------------------------------------------------------------------------------------------------------------------------------------------------------------------|-----------------------------------------------------------------------------------------------------|-----------------------------|-----------------|-------------------|------------|------------|-------------------|-------------------|-------------------|-------------------|-------------|-------------|--------------------|------------|-------|-------|--------|--------|--------|--------|--------|--------|--------|--------|---------|
| #                                                                                                                                                                                                                                                                                                                                                                                                                                                                                                                                                                                                                                                                                                                                                                                                                                                                                                                                                                                                                                                                                                                                                                                                                                                                                                                                                                                                                                                                                                                                                                                                                                                                                                                                                                                                                                                                                                                                                                                                                                                                                                                                                                                                                                                                                                                                                                                                                                                |                                                                                                     | T <sub>core</sub>           | T <sub>sk</sub> | T <sub>body</sub> | HR         | HYD        | T <sub>body</sub> | T <sub>body</sub> | T <sub>body</sub> | T <sub>body</sub> |             | 1 year      | 10 years           | %          |       |       |        |        |        |        |        |        |        |        |         |
|                                                                                                                                                                                                                                                                                                                                                                                                                                                                                                                                                                                                                                                                                                                                                                                                                                                                                                                                                                                                                                                                                                                                                                                                                                                                                                                                                                                                                                                                                                                                                                                                                                                                                                                                                                                                                                                                                                                                                                                                                                                                                                                                                                                                                                                                                                                                                                                                                                                  | <b>Delphi item:</b>                                                                                 | <b>1</b>                    | <b>2</b>        | <b>3</b>          | <b>4</b>   | <b>13</b>  | <b>5</b>          | <b>6</b>          | <b>7</b>          | <b>8</b>          | <b>9</b>    | <b>10</b>   | <b>11</b>          | <b>12</b>  |       |       |        |        |        |        |        |        |        |        |         |
|                                                                                                                                                                                                                                                                                                                                                                                                                                                                                                                                                                                                                                                                                                                                                                                                                                                                                                                                                                                                                                                                                                                                                                                                                                                                                                                                                                                                                                                                                                                                                                                                                                                                                                                                                                                                                                                                                                                                                                                                                                                                                                                                                                                                                                                                                                                                                                                                                                                  | <b>Delphi score:</b>                                                                                | <b>13.3</b>                 | <b>7.1</b>      | <b>6.9</b>        | <b>6.4</b> | <b>6.8</b> | <b>4.7</b>        | <b>8.1</b>        | <b>2.5</b>        | <b>4.7</b>        | <b>12.7</b> | <b>16.3</b> | <b>4.7</b>         | <b>6.0</b> |       |       |        |        |        |        |        |        |        |        |         |
| 51                                                                                                                                                                                                                                                                                                                                                                                                                                                                                                                                                                                                                                                                                                                                                                                                                                                                                                                                                                                                                                                                                                                                                                                                                                                                                                                                                                                                                                                                                                                                                                                                                                                                                                                                                                                                                                                                                                                                                                                                                                                                                                                                                                                                                                                                                                                                                                                                                                               | Dew Point (Bruce; 1916) <sup>[appr:38]</sup>                                                        | 0.062                       | 0.226           | 0.299             | -          | 0.071      | 0.582             | -                 | -                 | -                 |             | 0.201       | 0.201              | 8.2        |       |       |        |        |        |        |        |        |        |        |         |
| 119                                                                                                                                                                                                                                                                                                                                                                                                                                                                                                                                                                                                                                                                                                                                                                                                                                                                                                                                                                                                                                                                                                                                                                                                                                                                                                                                                                                                                                                                                                                                                                                                                                                                                                                                                                                                                                                                                                                                                                                                                                                                                                                                                                                                                                                                                                                                                                                                                                              | Radiation Equivalent Effective Temperature (Pigmented) (Sheleihovsky; 1948) <sup>[cit:39]</sup>     | 0.035                       | 0.181           | 0.214             | 0.079      | 0.053      | 0.574             | -                 | -                 | -                 |             | 0.082       | 0.088              | 6.8        |       |       |        |        |        |        |        |        |        |        |         |
| 118                                                                                                                                                                                                                                                                                                                                                                                                                                                                                                                                                                                                                                                                                                                                                                                                                                                                                                                                                                                                                                                                                                                                                                                                                                                                                                                                                                                                                                                                                                                                                                                                                                                                                                                                                                                                                                                                                                                                                                                                                                                                                                                                                                                                                                                                                                                                                                                                                                              | Radiation Equivalent Effective Temperature (Non-Pigmented) (Sheleihovsky; 1948) <sup>[cit:39]</sup> | 0.038                       | 0.179           | 0.211             | 0.068      | 0.053      | 0.573             | -                 | -                 | -                 |             | 0.081       | 0.087              | 6.7        |       |       |        |        |        |        |        |        |        |        |         |
| 60                                                                                                                                                                                                                                                                                                                                                                                                                                                                                                                                                                                                                                                                                                                                                                                                                                                                                                                                                                                                                                                                                                                                                                                                                                                                                                                                                                                                                                                                                                                                                                                                                                                                                                                                                                                                                                                                                                                                                                                                                                                                                                                                                                                                                                                                                                                                                                                                                                               | Effective Radiant Field (Gagge; 1967) <sup>[cit:40]</sup>                                           | -                           | 0.200           | 0.115             | 0.151      | 0.046      | 0.617             | -                 | -                 | -                 |             | 0.077       | 0.083              | 6.4        |       |       |        |        |        |        |        |        |        |        |         |
| 61                                                                                                                                                                                                                                                                                                                                                                                                                                                                                                                                                                                                                                                                                                                                                                                                                                                                                                                                                                                                                                                                                                                                                                                                                                                                                                                                                                                                                                                                                                                                                                                                                                                                                                                                                                                                                                                                                                                                                                                                                                                                                                                                                                                                                                                                                                                                                                                                                                               | Effective Radiant Field (Nishi; 1981) <sup>40</sup>                                                 | -                           | 0.200           | 0.111             | 0.148      | 0.047      | 0.616             | -                 | -                 | -                 |             | 0.077       | 0.083              | 6.4        |       |       |        |        |        |        |        |        |        |        |         |
| 177                                                                                                                                                                                                                                                                                                                                                                                                                                                                                                                                                                                                                                                                                                                                                                                                                                                                                                                                                                                                                                                                                                                                                                                                                                                                                                                                                                                                                                                                                                                                                                                                                                                                                                                                                                                                                                                                                                                                                                                                                                                                                                                                                                                                                                                                                                                                                                                                                                              | Wet Kata Cooling Power (Krisha; 1996) <sup>41</sup>                                                 | 0.064                       | 0.058           | 0.110             | -          | 0.100      | 0.517             | -                 | -                 | -                 |             | 0.062       | 0.067              | 4.7        |       |       |        |        |        |        |        |        |        |        |         |
| <p><b>Notes:</b> T<sub>core</sub> represents the magnitude of the relationship (correlation coefficient r) between the current thermal index and the core temperature of the workers.<br/> T<sub>sk</sub> represents the magnitude of the relationship (correlation coefficient r) between the current thermal index and the mean skin temperature of the workers.<br/> T<sub>body</sub> represents the magnitude of the relationship (correlation coefficient r) between the current thermal index and the mean body temperature of the workers.<br/> HR represents the magnitude of the relationship (correlation coefficient r) between the current thermal index and the heart rate of the workers.<br/> HYD represents the magnitude of the relationship (correlation coefficient r) between the current thermal index and the heart rate of the workers.<br/> ROC represents ability of each thermal index to diagnose increased mean body temperature (&gt;36.7°C) using the Area Under the ROC curve.<br/> Sensitivity the sensitivity (also called the true positive rate) of a thermal index to measure the proportion of workers with high mean body temperature (&gt;36.7°C) who are correctly identified as having high mean body temperature.<br/> Specificity represents the specificity (also called the true negative rate) of a Thermal Index to measure the proportion of workers with normal mean body temperature (&lt;36.7°C) who are correctly identified as not having high mean body temperature.<br/> RR represents “Risk Ration” and it describes the capacity of each Thermal Index to diagnose the increase in risk for having high mean body temperature when being exposed to environmental parameters characterized by different heat stress category.<br/> Categories represents the availability of categories indicating the level of heat stress experienced by workers.<br/> Guidance represents the availability of published health-related recommendations for the categories identified for the current thermal index.<br/> Cost-effectiveness represents the cost-effectiveness during the 1<sup>st</sup> and the 10<sup>th</sup> year of using a thermal index.<br/> SCORE represents the score overall score of each thermal index in percentage points. A score of 100 percentage points covers all (100 %) the requirements determined by the experts who participated in the Delphi exercise.</p> |                                                                                                     |                             |                 |                   |            |            |                   |                   |                   |                   |             |             |                    |            |       |       |        |        |        |        |        |        |        |        |         |
| <table border="1"> <tr> <td>0-10%</td> <td>10-20%</td> <td>20-30%</td> <td>30-40%</td> <td>40-50%</td> <td>50-60%</td> <td>60-70%</td> <td>70-80%</td> <td>80-90%</td> <td>90-100%</td> </tr> </table>                                                                                                                                                                                                                                                                                                                                                                                                                                                                                                                                                                                                                                                                                                                                                                                                                                                                                                                                                                                                                                                                                                                                                                                                                                                                                                                                                                                                                                                                                                                                                                                                                                                                                                                                                                                                                                                                                                                                                                                                                                                                                                                                                                                                                                           |                                                                                                     |                             |                 |                   |            |            |                   |                   |                   |                   |             |             |                    |            |       | 0-10% | 10-20% | 20-30% | 30-40% | 40-50% | 50-60% | 60-70% | 70-80% | 80-90% | 90-100% |
| 0-10%                                                                                                                                                                                                                                                                                                                                                                                                                                                                                                                                                                                                                                                                                                                                                                                                                                                                                                                                                                                                                                                                                                                                                                                                                                                                                                                                                                                                                                                                                                                                                                                                                                                                                                                                                                                                                                                                                                                                                                                                                                                                                                                                                                                                                                                                                                                                                                                                                                            | 10-20%                                                                                              | 20-30%                      | 30-40%          | 40-50%            | 50-60%     | 60-70%     | 70-80%            | 80-90%            | 90-100%           |                   |             |             |                    |            |       |       |        |        |        |        |        |        |        |        |         |



## REFERENCES

1. Yaglou CP, Minard D. *Prevention of heat casualties at Marine Corps training centers*. 1956.
2. Jendritzky G, de Dear R, Havenith G. UTCI—why another thermal index? *Int J Biometeorol*. 2012;56(3):421-428.
3. Emmanuel R. Thermal comfort implications of urbanization in a warm-humid city: the Colombo Metropolitan Region (CMR), Sri Lanka. *Build Environ*. 2005;40(12):1591-1601.
4. Maftai C, Buta C. Application of thermal discomfort indices for the coastal zone of Black Sea, in Dobrogea Region. *Ovidius University Annals of Constanta-Series Civil Engineering*. 2017;19(1):87-100.
5. Pantavou K, Santamouris M, Asimakopoulos D, Theoharatos G. Empirical calibration of thermal indices in an urban outdoor Mediterranean environment. *Build Environ*. 2014;80:283-292.
6. Blazejczyk K, Epstein Y, Jendritzky G, Staiger H, Tinz B. Comparison of UTCI to selected thermal indices. *Int J Biometeorol*. 2012;56(3):515-535.
7. Lee DH, Henschel A. Effects of physiological and clinical factors on response to heat. *Ann N Y Acad Sci*. 1966;134(2):743-749.
8. Błażejczyk K. *Bioklimatyczne uwarunkowania rekreacji i turystyki w Polsce*. vol 192. IGiPZ PAN; 2004.
9. Katerusha O, Safranov T. Assessment of bioclimatic resources in the coastal zone of Odessa region. *Aerul si Apa Componente ale Mediului*. 2013:25.
10. Kalkstein LS, Valimont KM. An evaluation of summer discomfort in the United States using a relative climatological index. *Bull Am Meteorol Soc*. 1986;67(7):842-848.
11. Stribley RF, Nunneley SA. *Fighter index of thermal stress: Development of interim guidance for hot-weather USAF operations*. 1978.
12. Steadman RG. A universal scale of apparent temperature. *Journal of Climate and Applied Meteorology*. 1984;23(12):1674-1687.
13. Landsberg HE. *The assessment of human bioclimate: a limited review of physical parameters*. 1972. *WMO Technical Note No123*.
14. Lemke B, Kjellstrom T. Calculating workplace WBGT from meteorological data: a tool for climate change assessment. *Ind Health*. 2012;50(4):267-278.
15. Smoyer-Tomic KE, Rainham D. Beating the heat: development and evaluation of a Canadian hot weather health-response plan. *Environ Health Perspect*. 2001;109(12):1241-1248.
16. Steadman RG. Norms of apparent temperature in Australia. *Australian Meteorological Magazine*. 1994;43(1):1-16.
17. Ono M, Tonouchi M. Estimation of wet-bulb globe temperature using generally measured meteorological indices. *Japanese Journal of Biometeorology*. 2014;50(4):147-157. doi:10.11227/seikisho.50.147
18. 2018 What is the discomfort index? (2018).
19. Giles BD, Balafoutis C, Maheras P. Too hot for comfort: the heatwaves in Greece in 1987 and 1988. *Int J Biometeorol*. 1990;34(2):98-104.
20. Błażejczyk K, Kunert A. *Bioklimatyczne uwarunkowania rekreacji i turystyki w Polsce*. *Monografie Instytutu Geografii i Przestrzennego Zagospodarowania PAN*. 2011;13
21. Robaa E-S. Effect of urbanization and industrialization processes on outdoor thermal human comfort in Egypt. *Atmospheric and Climate Sciences*. 2011;1(03):100.

22. Auliciems A, Szokolay SV. *Thermal comfort*. 2007. 0 86776 729 4. Accessed 2020-04-29.  
[https://dev.humanitarianlibrary.org/sites/default/files/2014/02/plea\\_2007\\_thermal\\_comfort.pdf](https://dev.humanitarianlibrary.org/sites/default/files/2014/02/plea_2007_thermal_comfort.pdf)
23. Morris LA. *Thermal indices in mining: a physiological evaluation*. Loughborough University; 1984.
24. Bründl W, Höppe P. Advantages and disadvantages of the urban heat island—an evaluation according to the hygro-thermic Effects. *Archives for meteorology, geophysics, and bioclimatology, Series B*. 1984;35(1-2):55-66.
25. LaFleur D. Weather and human comfort in Montreal: an example of summer conditions. *Clim Bull*. 1971;10:13-23.
26. Moran DS, Pandolf KB, Shapiro Y, et al. An environmental stress index (ESI) as a substitute for the wet bulb globe temperature (WBGT). *J Therm Biol*. 2001;26(4-5):427-431.
27. Blazejczyk K. New indices to assess thermal risks outdoors. 2005:22-26.
28. Fischereit J, Schlünzen KH. Evaluation of thermal indices for their applicability in obstacle-resolving meteorology models. *Int J Biometeorol*. 2018;62(10):1887-1900.
29. Roshan G. Suggestion a new base temperature for calculating the amount of energy demand based on thermal comfort indices and temperature–Physiologic. 2017;
30. Sen J, Nag PK. Effectiveness of human-thermal indices: Spatio-temporal trend of human warmth in tropical India. *Urban Clim*. 2019;27:351-371.
31. McPherson MJ. Physiological reactions to climatic conditions. *Subsurface Ventilation and Environmental Engineering*. Springer; 1993:603-650.
32. Moran D, Pandolf K, Laor A, Heled Y, Matthew W, Gonzalez R. Evaluation and refinement of the environmental stress index for different climatic conditions. *J Basic Clin Physiol Pharmacol*. 2003;14(1):1-16.
33. Eissing G. Climate assessment indices. *Ergonomics*. 1995;38(1):47-57.
34. Onkaram B, Stroschein L, Goldman R. *A Comparison of Four Instruments for Measuring WBGT Index Correlations of Botsball with WBGT*. 1978.
35. Maloney SK, Forbes CF. What effect will a few degrees of climate change have on human heat balance? Implications for human activity. *Int J Biometeorol*. 2011;55(2):147-160.
36. Ramsey JD, Bernard TE. Heat Stress. In: Harris R, ed. *Patty's Industrial Hygiene*. 2001.
37. Cena K. Environmental heat loss. *Recent Advances in Medical Thermology*. Springer; 1984:81-93.
38. Hardy B. ITS-90 formulations for vapor pressure, frostpoint temperature, dewpoint temperature, and enhancement factors in the range–100 to+ 100 C. 1998:1-8.
39. Русанов ВИ. *Комплексные метеорологические показатели и методы оценки климата для медицинских целей: Учебное пособие [in English: Integrated meteorological indicators and climate assessment methods for medical purposes: A study guide]*. Издательство Омского университета; 1981.
40. Nishi Y. Measurement of thermal balance of man. *Studies in environmental science*. Elsevier; 1981:29-39.
41. Krishna R. Research on the solution of mine ventilation problems. *Mine Planning and Equipment Selection 1996*. 1996:233.
